# Supplementary material for: Missense variants causing Wiedemann-Steiner syndrome preferentially occur in the KMT2A-CXXC domain and are accurately classified using AlphaFold2
Source: PubMed Central journal article supplement (PMC9249231; doi:10.1371/journal.pgen.1010278), 2022-06-21

**A**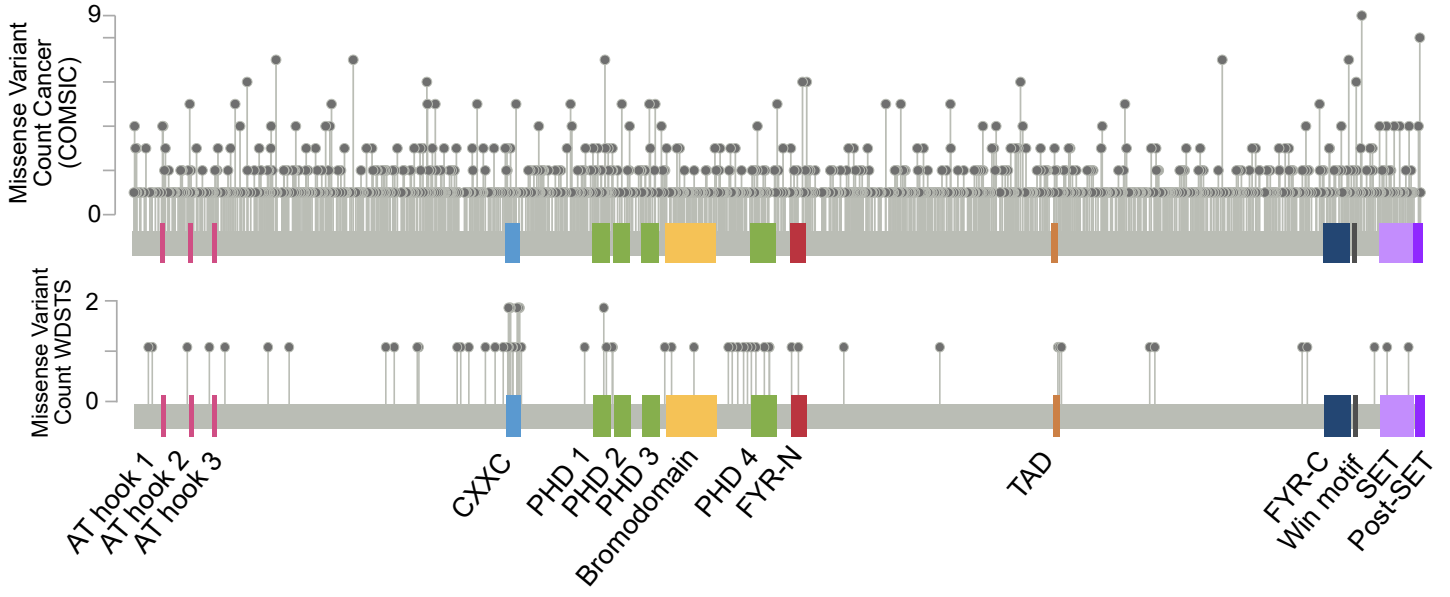**B**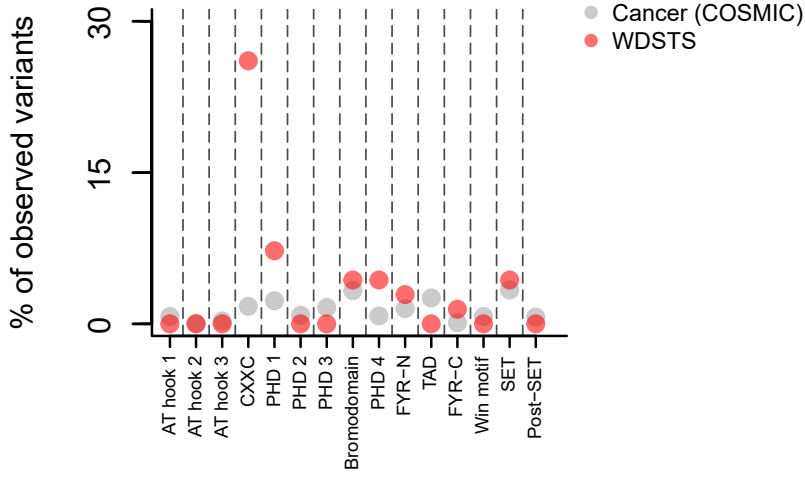**C**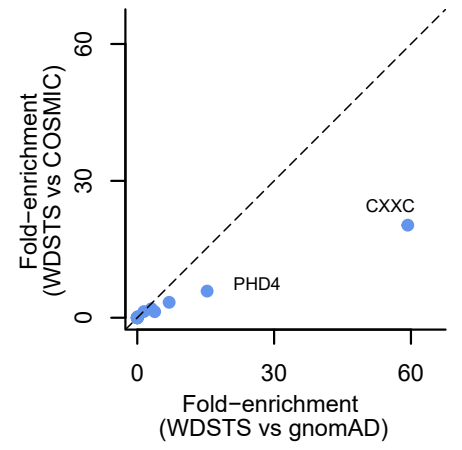**D**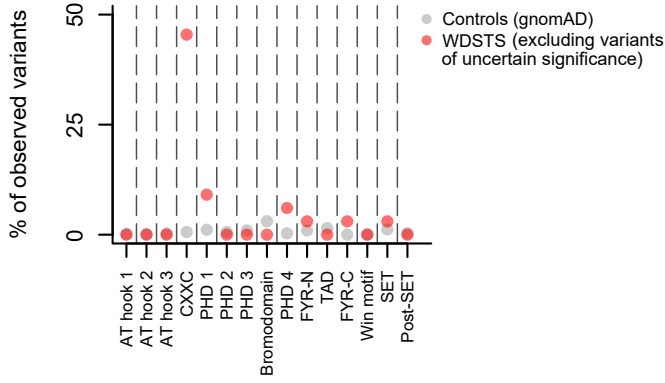**E**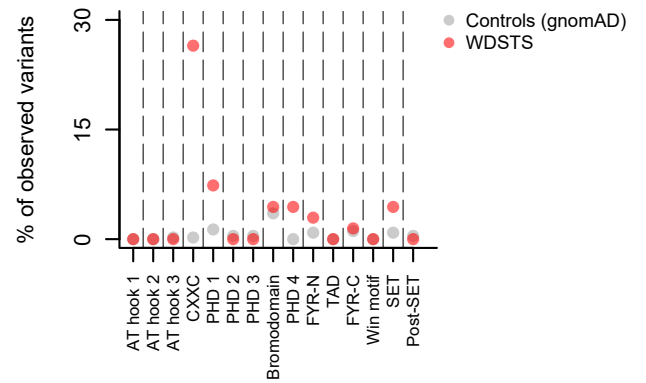

Supplement: pgen.1010278.s001.pdf [file pgen.1010278.s001.pdf]
