# Supplementary material for: Missense variants causing Wiedemann-Steiner syndrome preferentially occur in the KMT2A-CXXC domain and are accurately classified using AlphaFold2
Source: PubMed Central journal article supplement (PMC9249231; doi:10.1371/journal.pgen.1010278), 2022-06-21
Supplement: pgen.1010278.s007.pdf [file pgen.1010278.s007.pdf]

**A**

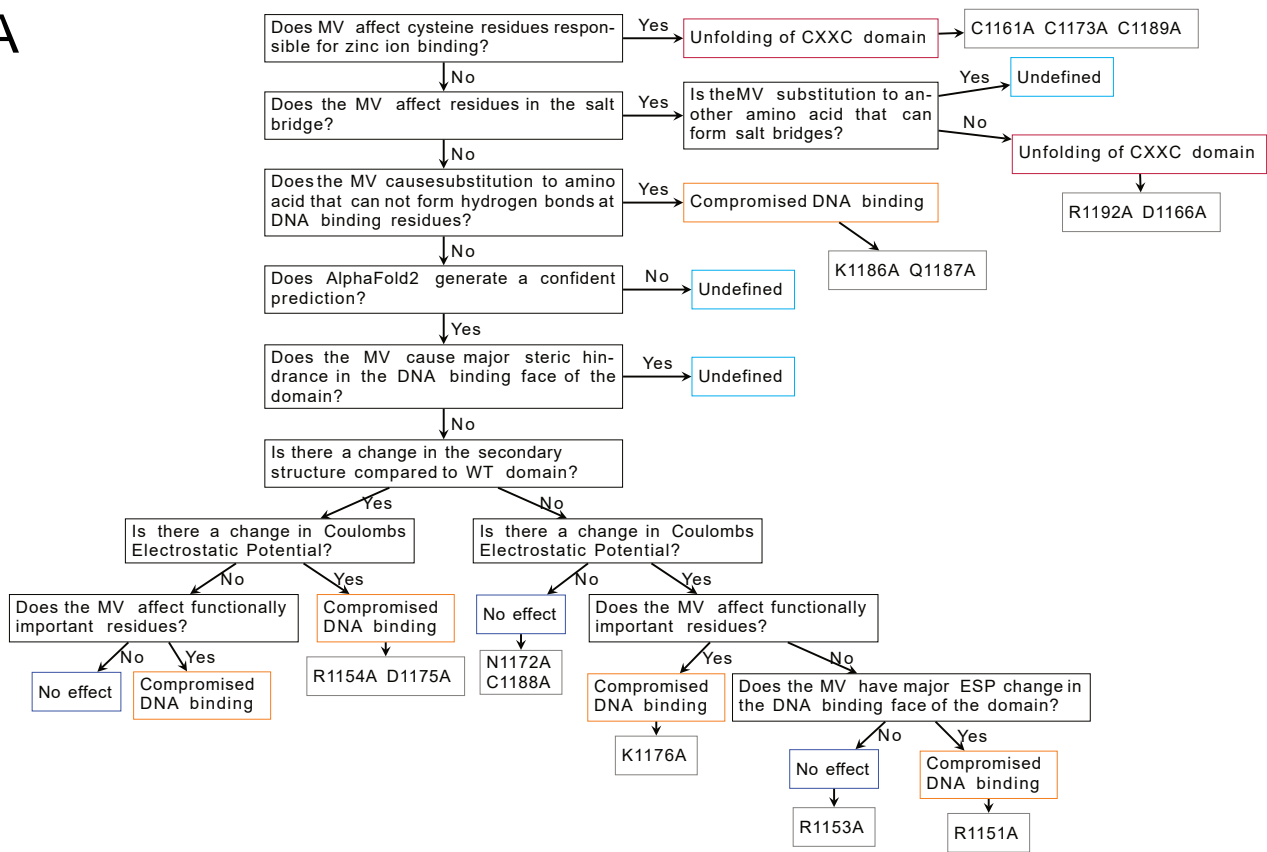

**B**

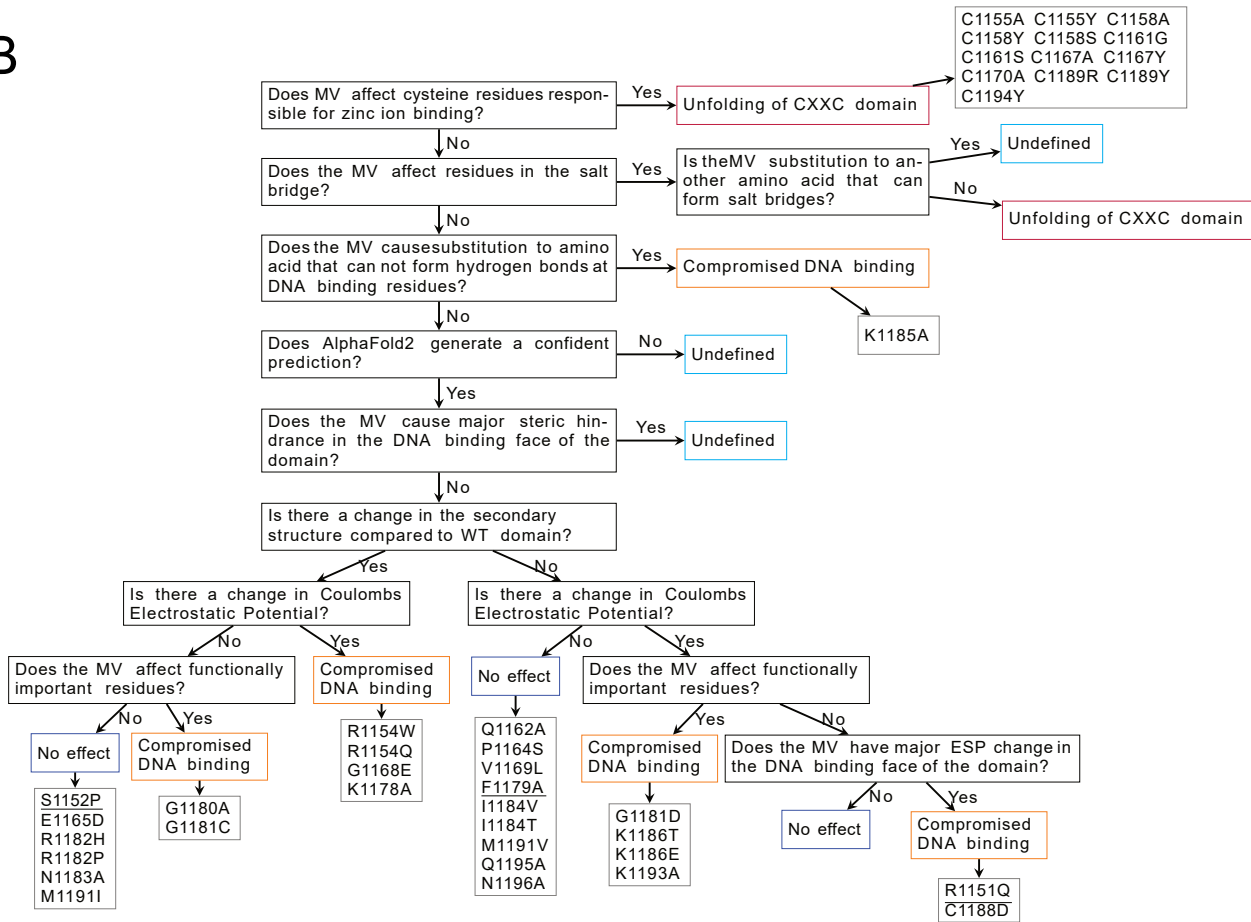

**C**

|      |          | Predicted |          |       |
|------|----------|-----------|----------|-------|
|      |          | benign    | damaging | total |
| True | benign   | 25        | 1        | 26    |
|      | damaging | 2         | 13       | 15    |
|      | total    | 27        | 14       |       |
