# Supplementary material for: Missense variants causing Wiedemann-Steiner syndrome preferentially occur in the KMT2A-CXXC domain and are accurately classified using AlphaFold2
Source: PubMed Central journal article supplement (PMC9249231; doi:10.1371/journal.pgen.1010278), 2022-06-21
Supplement: pgen.1010278.s009.pdf [file pgen.1010278.s009.pdf]

Functionally important residues in the CXXC domain of KMT2A

|                                                               |                                                                 |
|---------------------------------------------------------------|-----------------------------------------------------------------|
| Residues implicated in electrostatic interaction with the DNA | Arg1150, Arg1154, Lys1176, Lys1178, , Lys1190, Arg1192, Lys1193 |
| Residues responsible for hydrogen bond formation with the DNA | Lys1185, Lys1186, Gln1187                                       |
| Residues at the KFGG site                                     | Lys1178, Phe1179, Gly1180, Gly1181                              |
