# Supplementary material for: Missense variants causing Wiedemann-Steiner syndrome preferentially occur in the KMT2A-CXXC domain and are accurately classified using AlphaFold2
Source: PubMed Central journal article supplement (PMC9249231; doi:10.1371/journal.pgen.1010278), 2022-06-21
Supplement: pgen.1010278.s012.pdf [file pgen.1010278.s012.pdf]

| <b>Domain</b>   | <b>Amino acid co-ordinates</b><br>ENSP00000436786.1 |
|-----------------|-----------------------------------------------------|
| AT hook 1       | 169-180                                             |
| AT hook 2       | 217-227                                             |
| AT hook 3       | 301-309                                             |
| CXXC Domain     | 1147-1203                                           |
| PHD finger 1    | 1433-1480                                           |
| PHD finger 2    | 1481-1531                                           |
| PHD finger 3    | 1568-1625                                           |
| Bromodomain     | 1636-1770                                           |
| PHD finger 4    | 1935-1981                                           |
| FYR-N Domain    | 2021-2077                                           |
| TAD Domain      | 2850-2858                                           |
| FYR-C Domain    | 3669-3756                                           |
| Win Motif       | 3765-3773                                           |
| SET Domain      | 3832-3954                                           |
| Post-SET Domain | 3956-3972                                           |
